# Supplementary material for: Calcium-enriched carbon nanoparticles loaded with indocyanine green for near-infrared fluorescence imaging-guided synergistic calcium overload, photothermal therapy, and glutathione-depletion-enhanced photodynamic therapy
Source: Royal Society of Chemistry journal article supplement (doi:10.1039/d3tb02690f), 2024-01-01
Supplement: d3tb02690f1.pdf [file d3tb02690f1.pdf]

## Supporting Information

### **Calcium-enriched Carbon Nanoparticles Loaded with Indocyanine Green for Near-Infrared Fluorescence Imaging-Guided Synergistic Calcium Overload, Photothermal Therapy, and Glutathione-Depletion-Enhanced Photodynamic Therapy**

*E Pang,<sup>a</sup> Xiangcao Li,<sup>a</sup> Shaojing Zhao,<sup>a</sup> Yuanyu Tang,<sup>a</sup> Xuejian Xing,<sup>a</sup> Qin Wang,<sup>a</sup> Ke Yang,<sup>a</sup> Benhua Wang,<sup>a</sup> Shiguang Jin,<sup>b</sup> Xiangzhi Song,<sup>a</sup> and Minhuan Lan<sup>\*,a</sup>*

<sup>a</sup>Hunan Provincial Key Laboratory of Micro & Nano Materials Interface Science, College of Chemistry and Chemical Engineering, Central South University, Changsha, Hunan, 410083, P. R. China.

E-mail: minhuanlan@csu.edu.cn

<sup>b</sup>Center for Translational Medicine, The Affiliated Taizhou People's Hospital of Nanjing Medical University, Taizhou School of Clinical Medicine, Nanjing Medical University, Taizhou, Jiangsu, 225300, P. R. China.

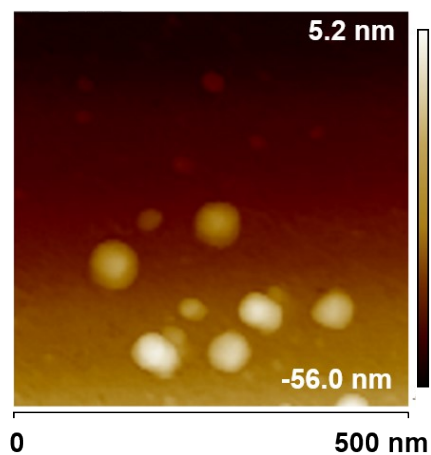

**Figure S1** AFM image of Ca-CNPs.

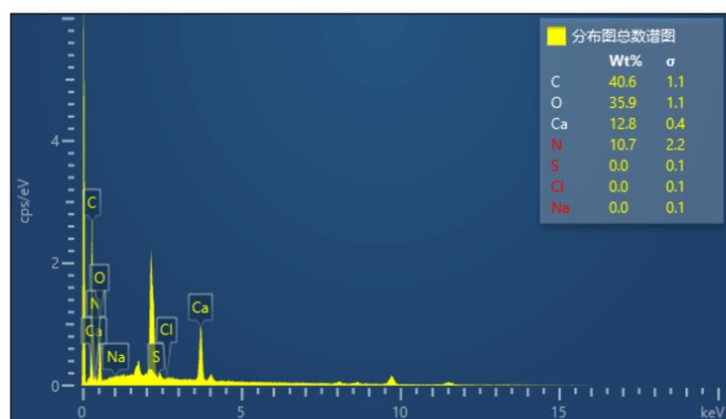

**Figure S2** EDS analysis results of Ca-CNPs.

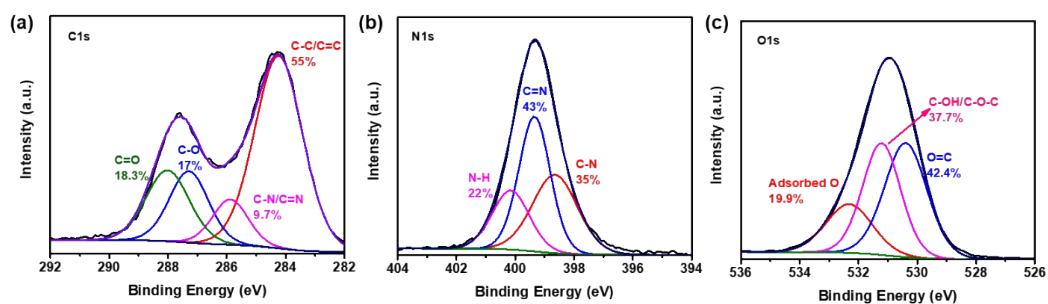

**Figure S3** The deconvoluted high-resolution (a) C1s (C=O: 18.3%, C-O: 17%, C-N/C=N: 9.7%, C-C/C=N: 55%), (b) N1s (N-H: 22%, C=N: 43%, C-N: 35%) and (c) O1s (Adsorbed-O: 19.9%, C-OH/C-O-C: 37.7%, O=C: 42.4%) XPS spectra of Ca-CNPs.

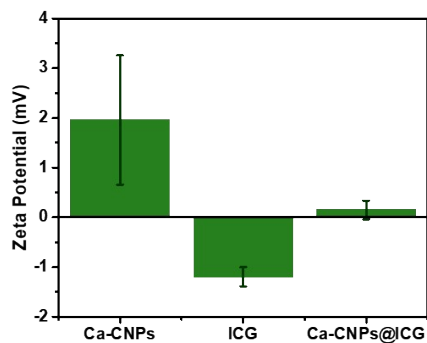

**Figure S4** Zeta potential diagram of Ca-CNPs, ICG, and Ca-CNPs@ICG.

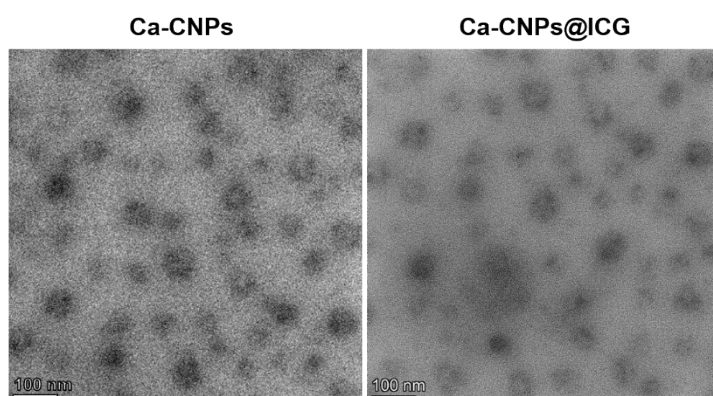

**Figure S5** TEM images of Ca-CNPs (left) and Ca-CNPs@ICG (right).

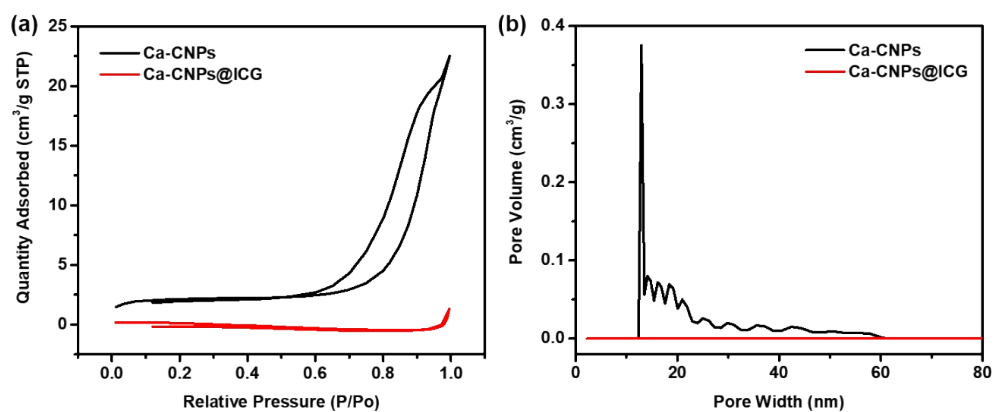

**Figure S6** (a)  $N_2$  adsorption-desorption isotherms, and (b) pore size distributions for Ca-CNPs and Ca-CNPs @ICG.

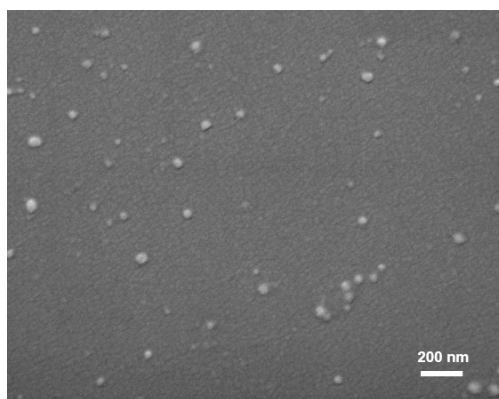

**Figure S7** SEM image of Ca-CNPs@ICG aqueous solution after 6 months of preservation.

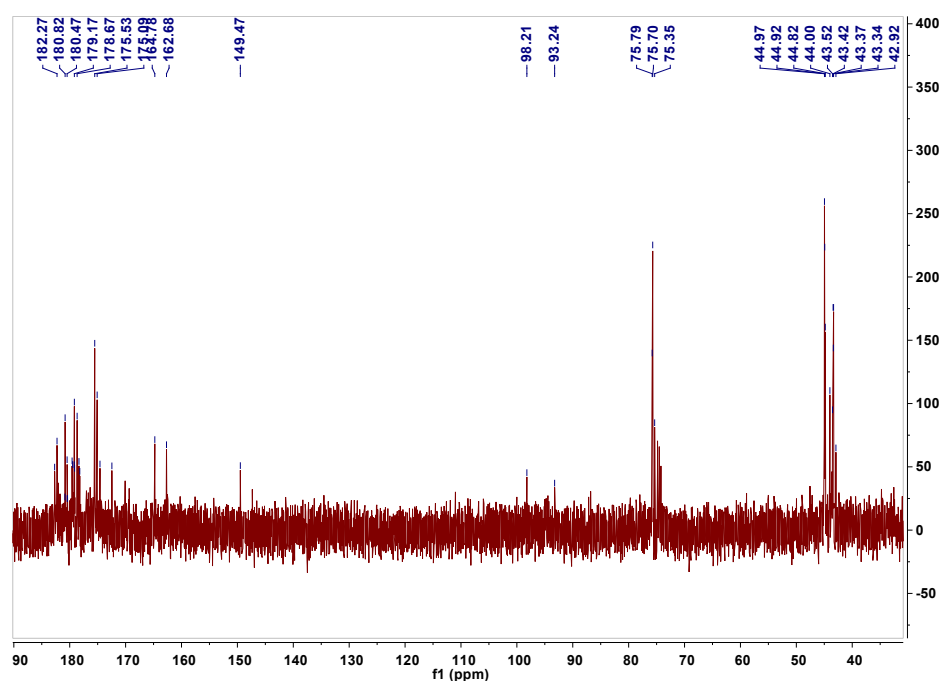

**Figure S8**  $^{13}\text{C}$  NMR spectrum of Ca-CNPs.

$^{13}\text{C}$  NMR (400 MHz,  $\text{D}_2\text{O}$ )  $\delta$  182.70, 182.27, 180.86, 180.82, 180.47, 180.43, 180.43, 179.58, 179.49, 179.20, 179.17, 179.13, 178.67, 178.35, 178.20, 175.53, 175.09, 174.59, 172.46, 164.78, 162.68, 149.47, 98.21, 93.24, 75.79, 75.70, 75.35, 44.97, 44.92, 44.82, 44.00, 43.52, 43.42, 43.37, 43.34, 42.92.

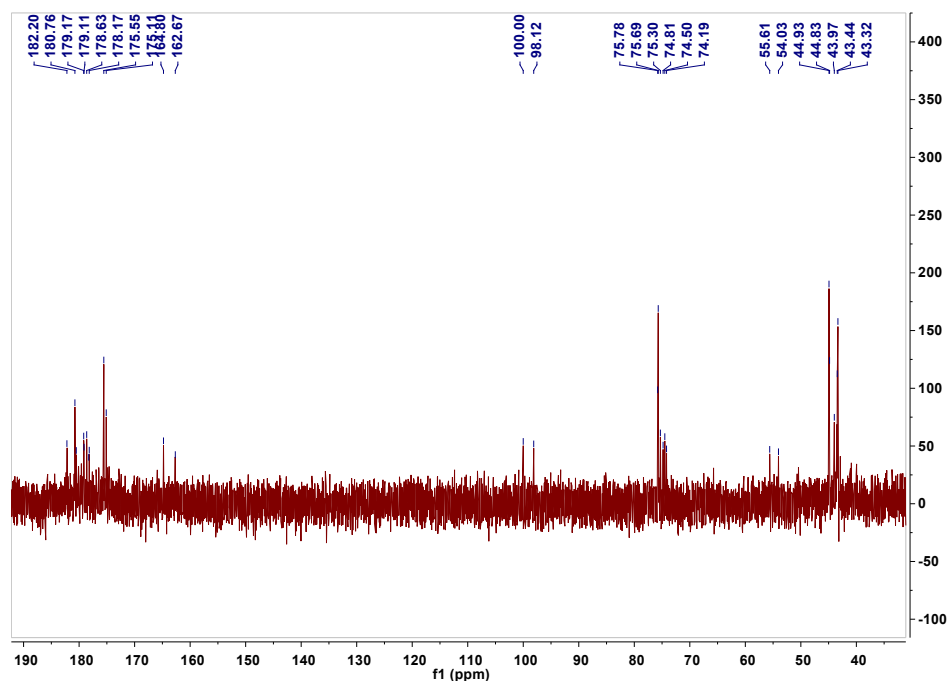

**Figure S9**  $^{13}\text{C}$  NMR spectrum of Ca-CNPs after GSH reaction.

$^{13}\text{C}$  NMR (400 MHz,  $\text{D}_2\text{O}$ )  $\delta$  182.70, 182.27, 180.86, 180.82, 180.47, 180.43, 180.43, 179.58, 179.49, 179.20, 179.17, 179.13, 178.67, 178.35, 178.20, 175.53, 175.09, 174.59, 172.46, 164.78, 162.68, 149.47, 98.21, 93.24, 75.79, 75.70, 75.35, 44.97, 44.92, 44.82, 44.00, 43.52, 43.42, 43.37, 43.34, 42.92.

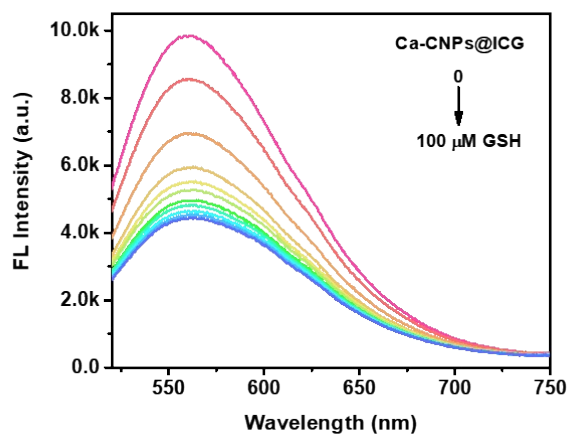

**Figure S10** GSH concentration-dependent fluorescence spectra of Ca-CNPs@ICG ( $\lambda_{\text{ex}} = 490 \text{ nm}$ ).

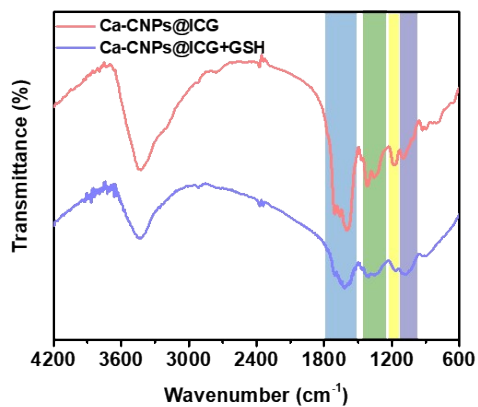

**Figure S11** FTIR spectra of Ca-CNPs@ICG before and after reaction with GSH.

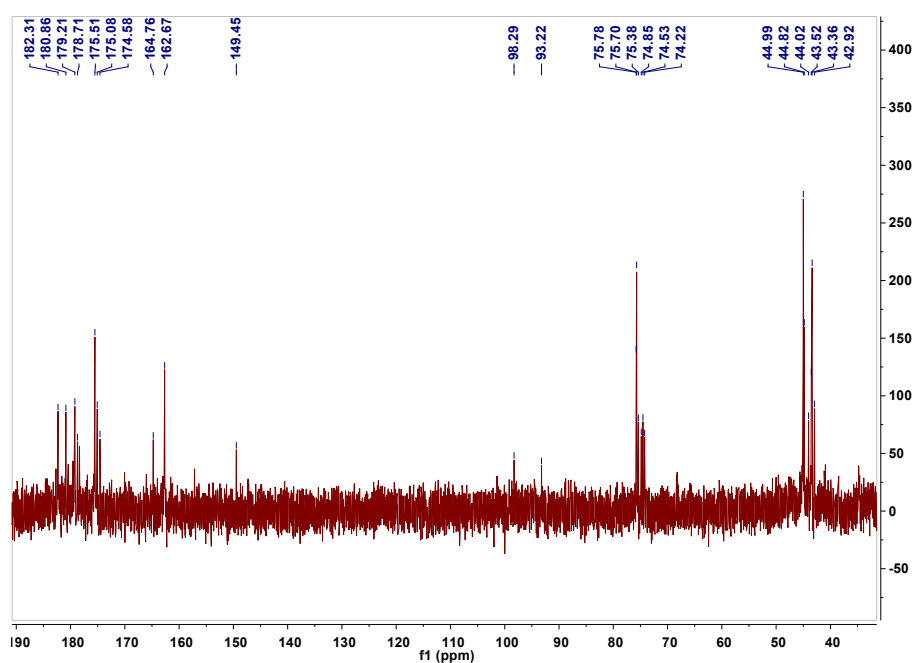

**Figure S12**  $^{13}\text{C}$  NMR spectrum of Ca-CNPs@ICG.

$^{13}\text{C}$  NMR (400 MHz,  $\text{D}_2\text{O}$ )  $\delta$  182.70, 182.27, 180.86, 180.82, 180.47, 180.43, 180.43, 179.58, 179.49, 179.20, 179.17, 179.13, 178.67, 178.35, 178.20, 175.53, 175.09, 174.59, 172.46, 164.78, 162.68, 149.47, 98.21, 93.24, 75.79, 75.70, 75.35, 44.97, 44.92, 44.82, 44.00, 43.52, 43.42, 43.37, 43.34, 42.92.

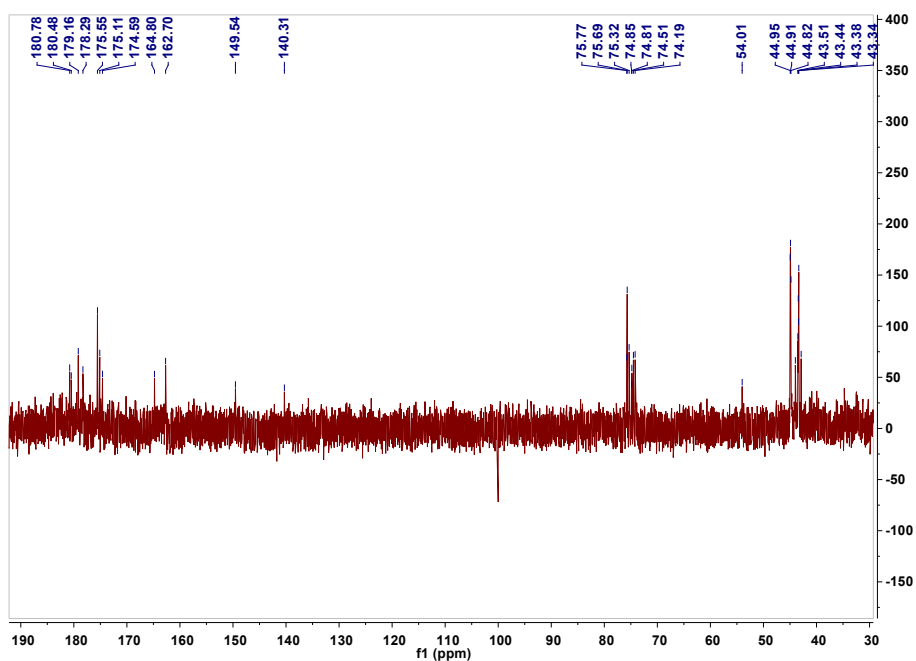

**Figure S13**  $^{13}\text{C}$  NMR spectrum of Ca-CNPs@ICG after GSH reaction.

$^{13}\text{C}$  NMR (400 MHz,  $\text{D}_2\text{O}$ )  $\delta$  182.70, 182.27, 180.86, 180.82, 180.47, 180.43, 180.43, 179.58, 179.49, 179.20, 179.17, 179.13, 178.67, 178.35, 178.20, 175.53, 175.09, 174.59, 172.46, 164.78, 162.68, 149.47, 98.21, 93.24, 75.79, 75.70, 75.35, 44.97, 44.92, 44.82, 44.00, 43.52, 43.42, 43.37, 43.34, 42.92.

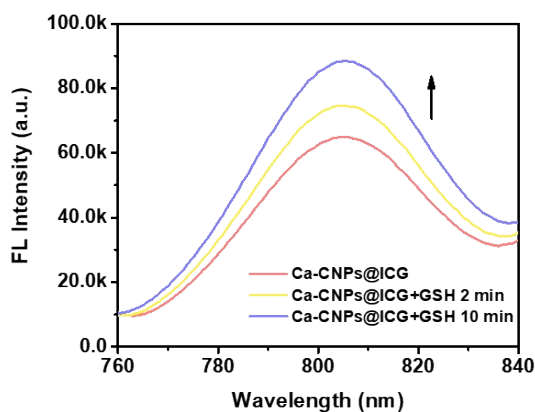

**Figure S14** Time-dependent fluorescence spectra of Ca-CNPs@ICG in the presence of GSH ( $\lambda_{\text{ex}} = 750 \text{ nm}$ ).

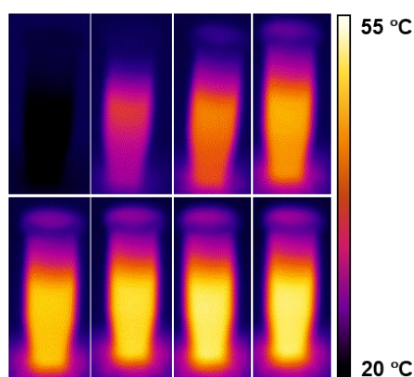

**Figure S15** Time-dependent infrared thermography image of Ca-CNPs@ICG aqueous solution under 808 nm laser irradiation ( $1 \text{ W}\cdot\text{cm}^{-2}$ , 10 min).

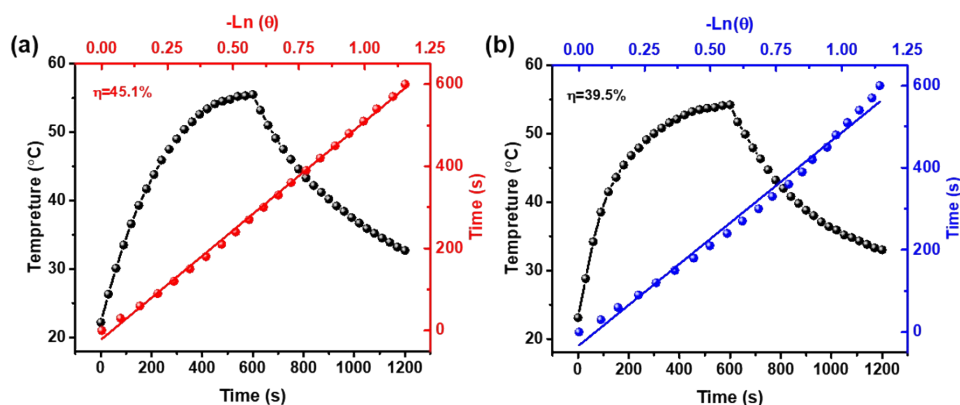

**Figure S16** Temperature increasing-decreasing curve and plot of cooling time vs  $-\text{Ln}(\theta)$  of (a) Ca-CNPs@ICG and (b) ICG.

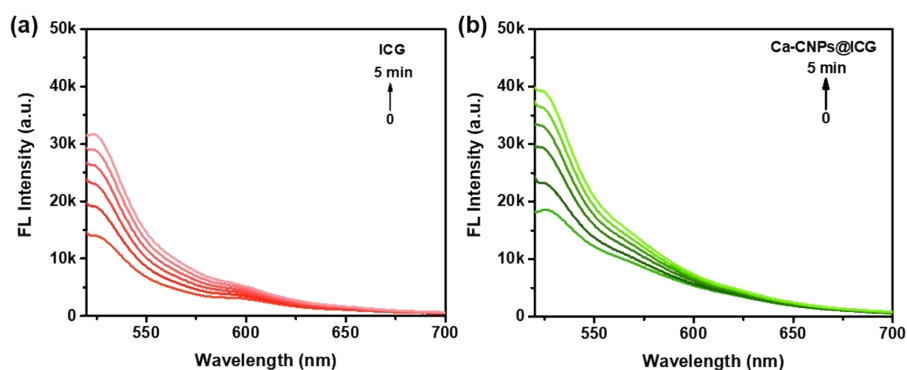

**Figure S17** Time-dependent fluorescence spectra changes of SOSG mixed with (a) ICG and (b) Ca-CNPs@ICG under 808 nm laser irradiation ( $\lambda_{\text{ex}} = 504 \text{ nm}$ ,  $1 \text{ W}\cdot\text{cm}^{-2}$ , 5 min).



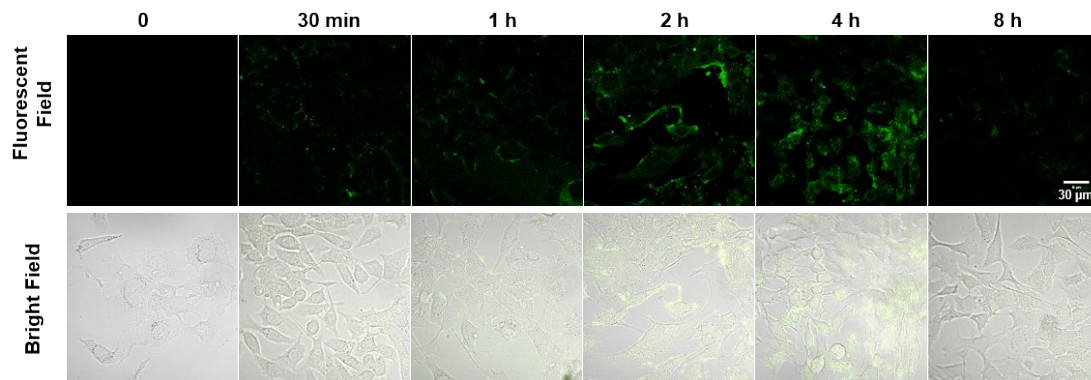

**Figure S18** Cellular uptake of Ca-CNPs@ICG by 4T1 tumour cells at different moments.

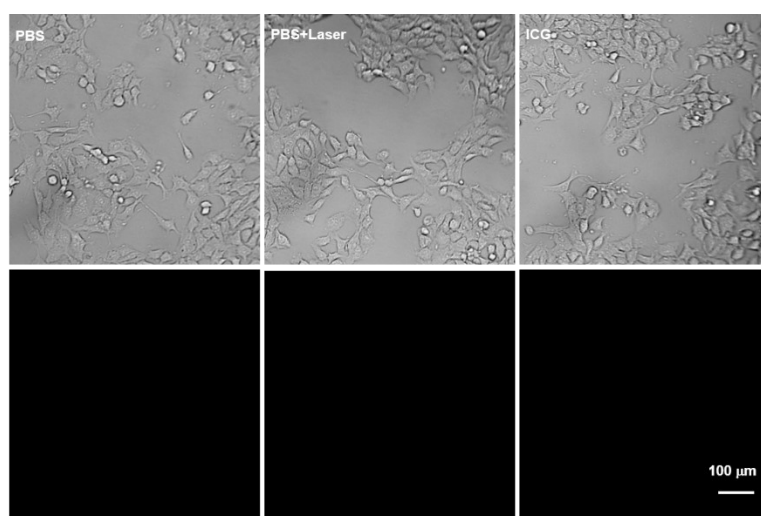

**Figure S19** DCFH-DA-based fluorescence images of 4T1 cells after different treatments (808 nm, 1 W·cm<sup>-2</sup>).

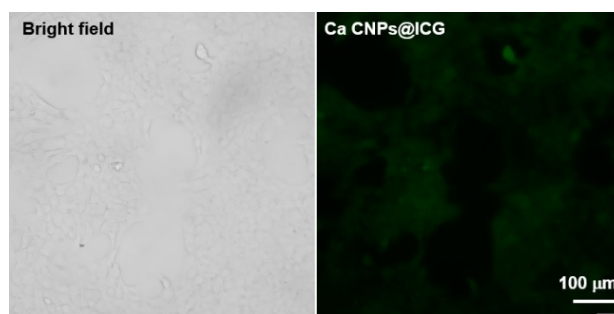

**Figure S20** Fluorescence imaging of 4T1 cells after incubation with Ca-CNPs@ICG only.

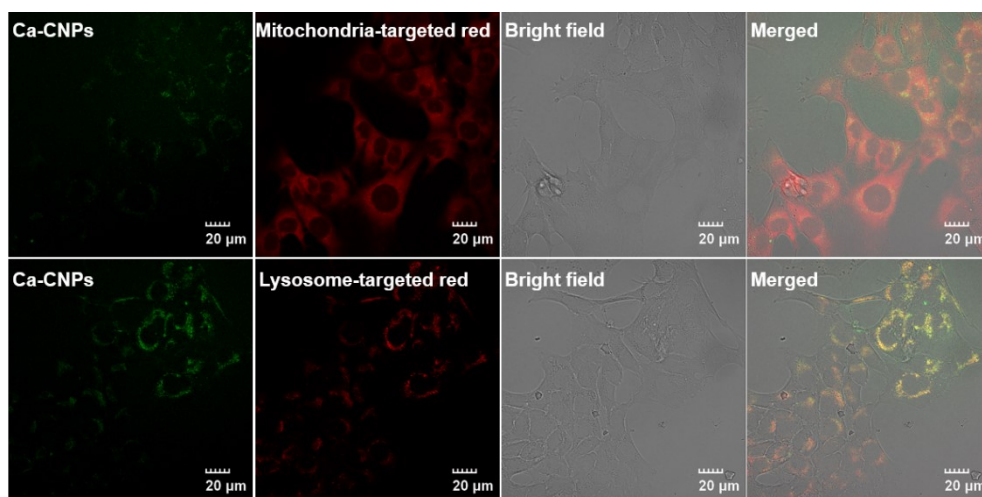

**Figure S21** The confocal imaging of 4T1 cells after co-incubation of Ca-CNPs with mitochondria-targeted red or lysosome-targeted red, respectively.

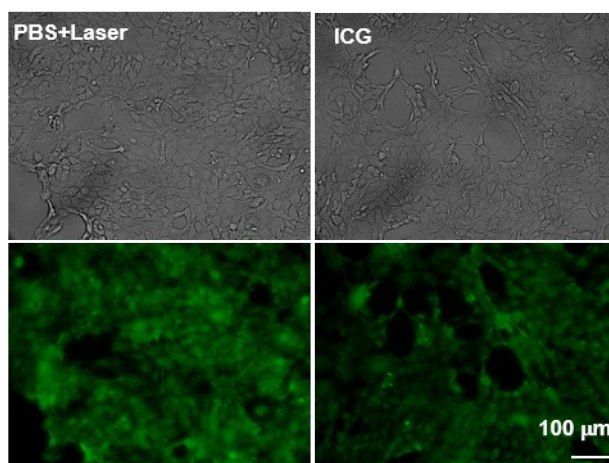

**Figure S22** Calcium-AM/PI-based fluorescence images of 4T1 cells after different treatments (808 nm,  $1 \text{ W} \cdot \text{cm}^{-2}$ ).

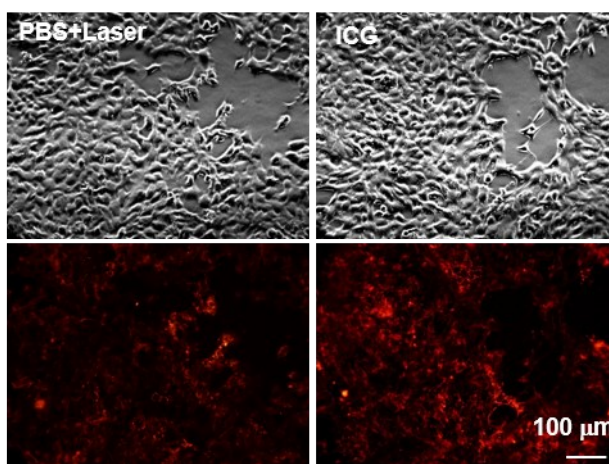

**Figure S23** JC-1-based fluorescence images of 4T1 cells after different treatments (808 nm,  $1 \text{ W} \cdot \text{cm}^{-2}$ ).

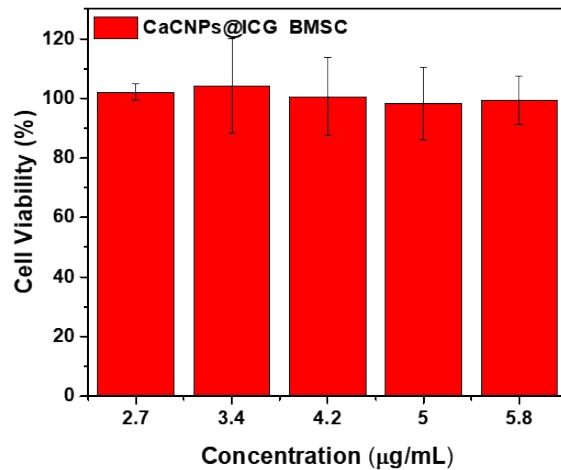

**Figure S24** Cytotoxicity assay after incubation of 4T1 cells with different concentrations of Ca-CNPs@ICG.

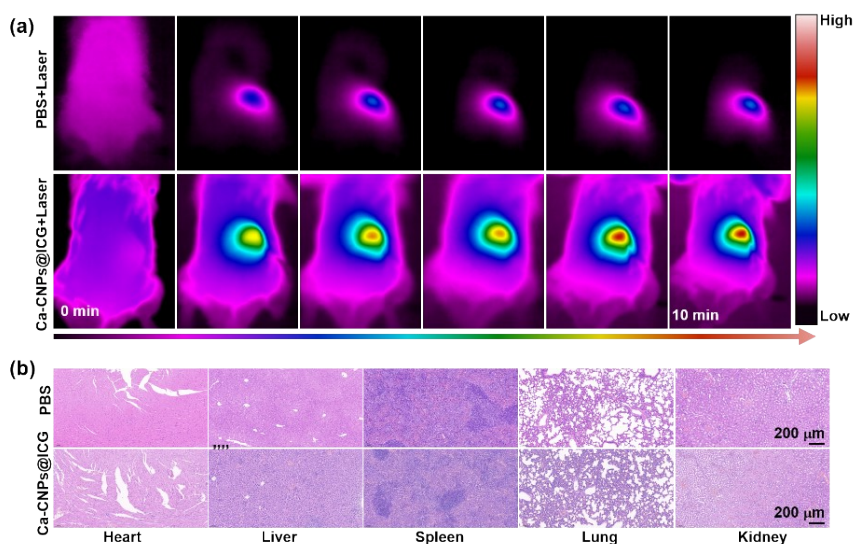

**Figure S25** (a) Temperature changes at the tumour site and (b) H&E of organ sections of the mice in different treatment groups.

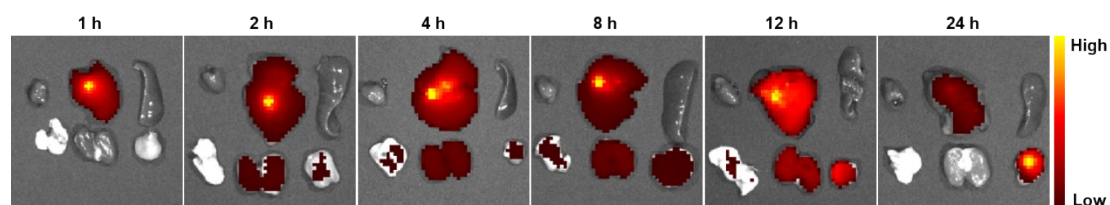

**Figure S26** Fluorescence imaging of major organs of mice at different moments ( $\lambda_{ex} = 780 \text{ nm}$ ).
